1        **A glycosylphosphatidylinositol-anchored  $\alpha$ -amylase encoded by *amyD***  
2        **contributes to a decrease in the molecular mass of cell wall  $\alpha$ -1,3-glucan in**  
3        ***Aspergillus nidulans***

4        Ken Miyazawa<sup>1,2</sup>, Takaaki Yamashita<sup>1</sup>, Ayumu Takeuchi<sup>1</sup>, Yuka Kamachi<sup>1</sup>, Akira Yoshimi<sup>3,4</sup>,  
5        Yuto Tashiro<sup>1</sup>, Ami Koizumi<sup>1</sup>, Shigekazu Yano<sup>5</sup>, Shin Kasahara<sup>6</sup>, Motoaki Sano<sup>7</sup>, Youhei  
6        Yamagata<sup>8</sup>, Tasuku Nakajima<sup>4</sup>, and Keietsu Abe<sup>1,4,9\*</sup>

7        <sup>1</sup> Laboratory of Applied Microbiology, Department of Microbial Biotechnology, Graduate  
8        School of Agricultural Sciences, Tohoku University, Sendai, Japan

9        <sup>2</sup> Laboratory of Filamentous Mycoses, Department of Fungal Infection, National Institute of  
10        Infectious Diseases, Tokyo, Japan

11        <sup>3</sup> Laboratory of Environmental Interface Technology of Filamentous Fungi, Graduate School  
12        of Agriculture, Kyoto University, Kyoto, Japan

13        <sup>4</sup> ABE-Project, New Industry Creation Hatchery Center, Tohoku University, Sendai, Japan

14        <sup>5</sup> Department of Biochemical Engineering, Graduate School of Engineering, Yamagata  
15        University, Yonezawa, Japan

16        <sup>6</sup> Food Microbiology Unit, School of Food and Agricultural Sciences, Miyagi University,  
17        Sendai, Japan

18        <sup>7</sup> Genome Biotechnology Laboratory, Kanazawa Institute of Technology, Hakusan, Japan

19        <sup>8</sup> Department of Applied Life Science, The United Graduate School of Agricultural Science,  
20        Tokyo University of Agriculture and Technology, Fuchu, Japan

21        <sup>9</sup> Department of Microbial Resources, Graduate School of Agricultural Science, Tohoku  
22        University, Sendai, Japan

23        \***Correspondence:** keietsu.abe.b5@tohoku.ac.jp

24        **Key words:** cell wall, filamentous fungi, *Aspergillus nidulans*,  $\alpha$ -1,3-glucan,  
25        glycosylphosphatidylinositol-anchored protein,  $\alpha$ -amylase

26

27        **Running title:**  $\alpha$ -1,3-Glucan biosynthesis regulated by AmyD

28        **Abstract**

29         $\alpha$ -1,3-Glucan is one of the main polysaccharides in the cell wall of *Aspergillus nidulans*. We  
30        previously revealed that it plays a role in hyphal aggregation in liquid culture, and that its  
31        molecular mass (MM) in an *agsA*-overexpressing (*agsA*<sup>OE</sup>) strain was larger than that in an  
32        *agsB*-overexpressing (*agsB*<sup>OE</sup>) strain. The mechanism that regulates the MM of  $\alpha$ -1,3-glucan

33 is poorly understood. Although the gene *amyD*, which encodes glycosyl-phosphatidylinositol  
34 (GPI)-anchored  $\alpha$ -amylase (AmyD), is involved in the biosynthesis of  $\alpha$ -1,3-glucan in *A.*  
35 *nidulans*, how it regulates this biosynthesis remains unclear. Here we constructed strains with  
36 disrupted *amyD* ( $\Delta amyD$ ) or overexpressed *amyD* (*amyD*<sup>OE</sup>) in the genetic background of the  
37 ABPU1 (wild-type), *agsA*<sup>OE</sup>, or *agsB*<sup>OE</sup> strain, and characterized the chemical structure of  $\alpha$ -  
38 1,3-glucans in the cell wall of each strain, focusing on their MM. The MM of  $\alpha$ -1,3-glucan  
39 from the *agsB*<sup>OE</sup> *amyD*<sup>OE</sup> strain was smaller than that in the parental *agsB*<sup>OE</sup> strain. In  
40 addition, the MM of  $\alpha$ -1,3-glucan from the *agsA*<sup>OE</sup>  $\Delta amyD$  strain was greater than that in the  
41 *agsA*<sup>OE</sup> strain. These results suggest that AmyD is involved in decreasing the MM of  $\alpha$ -1,3-  
42 glucan. We also found that the C-terminal GPI-anchoring region is important for these  
43 functions.

## 44 **Introduction**

45 The fungal cell wall, composed mainly of polysaccharides, is essential for the survival of the  
46 fungus (Latgè et al., 2017). It has recently been understood that the cell wall is a highly  
47 dynamic structure; cell-wall components are synthesized by synthases and then reconstructed  
48 by glycosyltransferases to form a proper cell-wall architecture (Latgè and Beauvais,  
49 2014;Latgè et al., 2017). The cell wall of filamentous fungi contains  $\alpha$ -glucans,  $\beta$ -glucans,  
50 chitin, and galactomannan. Some fungi form an extracellular matrix, which includes secretory  
51 polysaccharides such as galactosaminogalactan (Sheppard and Howell, 2016;Yoshimi et al.,  
52 2016;Miyazawa et al., 2019). Cell-wall polysaccharides of some *Aspergillus* species can be  
53 fractionated into alkali-soluble and alkali-insoluble fractions (Fontaine et al., 2000;Yoshimi et  
54 al., 2013;Dichtl et al., 2015;Zhang et al., 2017b). The alkali-soluble fraction contains mainly  
55  $\alpha$ -1,3-glucan with interconnecting  $\alpha$ -1,4-linkage and some galactomannan (Bernard and  
56 Latge, 2001;Latgè, 2010). The alkali-insoluble fraction is composed of chitin,  $\beta$ -1,6-branched  
57  $\beta$ -1,3-glucan, and galactomannan (Fontaine et al., 2000;Bernard and Latge, 2001).

58 In the human pathogenic dimorphic yeast *Histoplasma capsulatum* and the rice blast  
59 fungus *Magnaporthe grisea*,  $\alpha$ -1,3-glucan functions as a stealth factor that prevents host  
60 immune recognition and consequently contributes to the establishment of invasion or  
61 infection (Rappleye et al., 2004;Rappleye et al., 2007;Fujikawa et al., 2009;Fujikawa et al.,  
62 2012). In addition, the pathogenesis of an  $\alpha$ -1,3-glucan-deficient strain is decreased in murine  
63 models infected with *Aspergillus fumigatus* (Henry et al., 2012;Beauvais et al., 2013).  
64 Recently,  $\alpha$ -1,3-glucan was reported to stimulate the polarization of regulatory T-cells by  
65 inducing programmed death-ligand 1 expression on human dendritic cells (Stephen-Victor et

66 al., 2017). Fontaine et al. (2010) revealed that  $\alpha$ -1,3-glucan has adhesivity when the conidia of  
67 *A. fumigatus* germinate.

68 Grün et al. (2005) analyzed the detailed chemical structure of  $\alpha$ -glucan in the cell wall of  
69 the fission yeast *Schizosaccharomyces pombe* and found that its molecular mass (MM) is  
70  $42 \square 600 \pm 5 \square 200$ , which is equivalent to a degree of polymerization of  $263 \pm 32$  (Grün et al.,  
71 2005). The  $\alpha$ -glucans derived from *S. pombe* are composed of two chains of  $\approx 120$  residues of  
72 1,3-linked  $\alpha$ -glucose with 12 residues of 1,4-linked  $\alpha$ -glucose at the reducing ends (Grün et  
73 al., 2005). In *Aspergillus wentii*, the water-insoluble (alkali-soluble) glucan has a MM of  
74  $\approx 850 \square 000$  and consists of 25 subunits (200 residues each) of  $\alpha$ -1,3-glucan separated by short  
75 spacers composed of 1,4-linked  $\alpha$ -glucan (Choma et al., 2013).

76 *Aspergillus* species have several  $\alpha$ -1,3-glucan synthase genes: two in *Aspergillus*  
77 *nidulans* (*agsA* and *agsB*), three in *A. fumigatus* (*AGS1–3*) and *Aspergillus oryzae* (*agsA–C*),  
78 and five in *Aspergillus niger* (*agsA–E*). Disruptants of *A. fumigatus* that lack a single gene or  
79 all three genes have been constructed (Beauvais et al., 2005; Maubon et al., 2006; Henry et al.,  
80 2012); these strains lack  $\alpha$ -1,3-glucan in the cell wall and are less pathogenic (Beauvais et al.,  
81 2013). In *A. oryzae*, *agsB* (orthologous to *A. nidulans agsB*) is the primary  $\alpha$ -1,3-glucan  
82 synthase gene (Zhang et al., 2017b). An *A. oryzae* disruptant lacking all three genes loses its  
83 cell-wall  $\alpha$ -1,3-glucan and forms small hyphal pellets under liquid culture conditions  
84 (Miyazawa et al., 2016). In *A. niger*, the expression of *agsA* (orthologous to *A. fumigatus*  
85 *AGS3*; no orthologue in *A. nidulans*) and *agsE* (orthologous to *A. nidulans agsB*) is  
86 upregulated in the presence of stress-inducing compounds in the cell wall (Damveld et al.,  
87 2005). In the kuro (black) koji mold *Aspergillus luchuensis*, disruption of *agsE* (orthologous  
88 to *A. nidulans agsB*) improves the protoplast formation (Tokashiki et al., 2019). Recently  
89 Uechi et al. revealed that *A. luchuensis agsB* (no orthologue in *A. nidulans*) plays a role in  
90 nigeran synthesis (Uechi et al., 2021). In *A. nidulans*,  $\alpha$ -1,3-glucan in vegetative hyphae is  
91 synthesized mainly by AgsB (Yoshimi et al., 2013; He et al., 2014). The hyphae of a mutant  
92 deficient in  $\alpha$ -1,3-glucan became fully dispersed, showing that  $\alpha$ -1,3-glucan is a hyphal  
93 aggregation factor (Yoshimi et al., 2013; He et al., 2014). We recently constructed strains  
94 overexpressing *agsA* (*agsA<sup>OE</sup>*) and *agsB* (*agsB<sup>OE</sup>*) in the genetic background of, respectively,  
95 *agsB* and *agsA* disruptants. The peak MM of alkali-soluble glucan from *agsA<sup>OE</sup>* was  
96  $1 \square 480 \square 000 \pm 80 \square 000$ , which was four times that from the *agsB<sup>OE</sup>* (MM,  $372 \square 000 \pm$   
97  $47 \square 000$ ) (Miyazawa et al., 2018). The alkali-soluble glucan derived from these strains  
98 contains several 1,4-linked spacer structures interlinking the  $\alpha$ -1,3-glucan subunits, which  
99 each contain 200 glucose residues (Miyazawa et al., 2018).

100 Outside of *A. fumigatus*, *A. nidulans agsB* and its orthologues are clustered with two  $\alpha$ -  
101 amylase-encoding genes (*amyD* and *amyG* in *A. nidulans*) (He et al., 2014; Yoshimi et al.,  
102 2017; Miyazawa et al., 2020). The *amyG* gene encodes an intracellular  $\alpha$ -amylase and is  
103 crucial for  $\alpha$ -1,3-glucan synthesis (He et al., 2014). The *amyD* gene in *A. nidulans* encodes  
104 glycosylphosphatidylinositol (GPI)-anchored  $\alpha$ -amylase. He et al. (2014) reported that  $\alpha$ -1,3-  
105 glucan contents increased by 50% in an *amyD*-disrupted ( $\Delta amyD$ ) strain and halved in an  
106 *amyD*-overexpressing (*actA(p)-amyD*) strain, suggesting that *amyD* has a repressive effect on  
107  $\alpha$ -1,3-glucan synthesis. In addition, He et al. (2017) analyzed the chronological changes of  $\alpha$ -  
108 1,3-glucan contents under liquid culture conditions. Whereas the amount of  $\alpha$ -1,3-glucan in  
109 strains that overexpressed the  $\alpha$ -1,3-glucanase-encoding gene (*mutA* or *agnB*) was decreased  
110 after 20 h from inoculation, the amount of  $\alpha$ -1,3-glucan in the cell wall of the *amyD*<sup>OE</sup> strain  
111 was half that of the wild-type strain from the initial stage of cultivation (He et al., 2017). He  
112 et al. (2017) suggested that AmyD decreased the amount of  $\alpha$ -1,3-glucan in the cell wall by a  
113 mechanism independent of the effect of  $\alpha$ -1,3-glucanase. The enzymatic characteristics of *A.*  
114 *niger* AgtA, which is encoded by an orthologue of *A. nidulans amyD*, have been reported (van  
115 der Kaaij et al., 2007). Although AgtA in *A. niger* barely hydrolyzed  $\alpha$ -1,3-glucan, it had  
116 relatively high transglycosylation activity on donor substrates with maltooligosaccharides  
117 (van der Kaaij et al., 2007). Overall, AmyD seems to indirectly decrease the amount of  $\alpha$ -1,3-  
118 glucan in the cell wall, but the detailed mechanism is still unknown.

119 Here, in a study of the function of *amyD* in  $\alpha$ -1,3-glucan biosynthesis in *A. nidulans*, we  
120 constructed strains with overexpression or disruption of *amyD* in the genetic backgrounds of  
121 the wild-type, *agsA*<sup>OE</sup>, and *agsB*<sup>OE</sup>. We performed several chemical analyses of  $\alpha$ -1,3-glucan  
122 derived from the strains, looking in particular at its MM, and examined the role of *amyD* in  
123 controlling the MM of  $\alpha$ -1,3-glucan in the cell wall.

## 124 **Materials and Methods**

### 125 **Strains and growth media**

126 Strains are listed in Table 1. Czapek-Dox (CD) medium was used as the standard culture, as  
127 described previously (Fujioka et al., 2007; Miyazawa et al., 2018).

### 128 **Construction of the *agsA*- and *agsB*-overexpressing strains**

129 We newly constructed *agsA*<sup>OE</sup> and *agsB*<sup>OE</sup> strains for this study. To generate *agsA*<sup>OE</sup>, pAPyT-  
130 *agsA* plasmids (Miyazawa et al., 2018) were digested with *NotI* and transformed into a  
131 disrupted *agsB* ( $\Delta agsB$ ) strain (Fig. S1A). Correct integration of *agsA* overexpression

132 cassettes was confirmed by PCR (Fig. S1B). To generate *agsB<sup>OE</sup>*, the disrupted *agsA* ( $\Delta$ *agsA*)  
133 strain was first generated using the Cre/*loxP* marker recycling system (Zhang et al., 2017a).  
134 The pAPG-cre/DagsA plasmid (Miyazawa et al., 2018) was digested with *EcoRI* and  
135 transformed into the ABPU1 (*argB<sup>+</sup>*) strain. Candidate strains were selected on CD medium  
136 without uridine and uracil, and then cultured on CD medium with uridine and uracil and 1%  
137 xylose to induce *Cre* expression (Fig. S1C). Strains that required uridine and uracil were  
138 isolated, and then replacement of the *agsA* gene was confirmed by PCR (Fig. S1D). The  
139 pAPyT-*agsB* plasmid was digested with *NotI* and transformed into the  $\Delta$ *agsA* strain (Fig.  
140 S1E). Correct integration of *agsB* overexpression cassettes was confirmed by PCR (Fig. S1B).

#### 141 **Construction of the *amyD<sup>OE</sup>* strain**

142 The *amyD<sup>OE</sup>* strain was constructed by replacing the native promoter with the constitutive *tefl*  
143 promoter. The sequences of the primers are listed in Table S1. To generate *amyD<sup>OE</sup>*, the  
144 plasmid pAPT-*amyD* was constructed (Fig. S2A). The 5'-non-coding region (amplicon 1) and  
145 the coding region (amplicon 2) of *amyD* were amplified from *A. nidulans* ABPU1 genomic  
146 DNA. The *pyrG* marker (amplicon 3) was amplified from the pAPG-cre/DagsA plasmid. The  
147 *tefl* promoter (amplicon 4) was amplified from the pAPyT-*agsB* plasmid. The four amplicons  
148 and a *SacI*-digested pUC19 vector were fused using an In-Fusion HD Cloning Kit (Clontech  
149 Laboratories, Inc., Mountain View, CA, USA). The resulting plasmid was digested with *SacI*,  
150 and transformed into the ABPU1 (*argB<sup>+</sup>*), *agsA<sup>OE</sup>*, and *agsB<sup>OE</sup>* strains (Fig. S2B). Correct  
151 integration of the cassette was confirmed by PCR (Fig. S2C).

#### 152 **Disruption of the *amyD* gene**

153 In the first round of PCR, gene fragments containing the 5'-non-coding region (amplicon 1)  
154 and the coding region (amplicon 2) of *amyD* were amplified from ABPU1 genomic DNA, and  
155 the *pyrG* gene (amplicon 3) was amplified from *A. oryzae* genomic DNA (Fig. S2D). The  
156 three resulting fragments were gel-purified and fused into a disruption cassette in the second  
157 round of PCR. The resulting PCR product was gel-purified and transformed into the ABPU1  
158 (*argB<sup>+</sup>*), *agsA<sup>OE</sup>*, and *agsB<sup>OE</sup>* strains (Fig. S2E). Replacement of the *amyD* gene was  
159 confirmed by PCR (Fig. S2F).

#### 160 **Expression of complementary *amyD* genes**

161 The sequences of the primers are listed in Table S1. A GPI-anchor modification site, the  $\omega$ -  
162 site, was predicted with the GPI Prediction Server v. 3.0 ([https://mendel.imp.ac.at/gpi/](https://mendel.imp.ac.at/gpi/gpi_server.html)  
163 [gpi\\_server.html](https://mendel.imp.ac.at/gpi/gpi_server.html)), and the best score for the  $\omega$ -site was Asn535 of *AmyD*. To remove the GPI

164 anchor of AmyD, 54 nucleotides corresponding to the 18 amino acid residues from Asn535 in  
165 AmyD were deleted from the authentic *amyD* gene (Fig. S3A). To create complementary  
166 genes that have full-length open reading frames of either *amyD* or the gene without the GPI  
167 anchor-coding region, the plasmids pAHT-*amyD*, pAHdPT-*amyD*, pAHT-*amyD*( $\Delta$ GPI), and  
168 pAHdPT-*amyD*( $\Delta$ GPI) were first constructed (Fig. S3A). To construct pAHT-*amyD*, primers  
169 IF-Ptef1-hph-Fw and IF-*amyD*-up-hph-Rv were amplified by PCR using pAPT-*amyD* as a  
170 template (amplicon 1). The hygromycin-resistance gene *hph* (amplicon 2) was amplified with  
171 primers 397-5 and 397-3 from pSK397 (Krappmann et al., 2006). The two amplicons were  
172 fused using a NEBuilder HiFi DNA Assembly kit (New England Biolabs, Ipswich, MA,  
173 USA) according to the manufacturer's instructions. Then, to delete the GPI anchor-encoding  
174 region of *amyD*, PCR amplification was performed with primers ANamyD-dGPI-Fw and  
175 ANamyD-dGPI-Rv from the resulting pAHT-*amyD* plasmid with PrimeSTAR Max DNA  
176 Polymerase (Takara Bio Inc., Kusatsu, Japan). The amplified fragment was transformed into  
177 DH5 $\alpha$  competent cells, and the pAHT-*amyD*( $\Delta$ GPI) plasmid was obtained (Fig. S3A). To  
178 construct pAHdPT-*amyD*, the first half (amplicon 1) and the second half (amplicon 2) of  
179 *pyrG* were amplified from *A. oryzae* genomic DNA. The fragment containing *hph*, *tefl*  
180 promoter, and *amyD* (amplicon 3) was amplified from pAHT-*amyD*. The three amplicons  
181 were fused using a NEBuilder kit. For pAHdPT-*amyD*( $\Delta$ GPI) construction, the fragment  
182 containing *hph*, *tefl* promoter, and *amyD* lacking its GPI anchor-coding region (amplicon 3')  
183 was amplified from pAHT-*amyD*( $\Delta$ GPI). The three amplicons and the *SacI*-digested pUC19  
184 vector were fused using an In-Fusion HD Cloning Kit (Fig. S3B). The pAHdPT-*amyD* and  
185 pAHdPT-*amyD*( $\Delta$ GPI) plasmids were digested with *SacI* and transformed into the  $\Delta$ *amyD*  
186 and *agsB*<sup>OE</sup>  $\Delta$ *amyD* strains (Fig. S3C). Correct integration of the cassettes was confirmed by  
187 PCR (Fig. S3D).

## 188 **RNA extraction and quantitative real-time PCR**

189 Mycelial cells cultured in CD liquid medium for 24 h were collected, and total RNA was  
190 extracted from the cells by using Sepasol-RNA I Super G (Nakalai Tesque, Kyoto, Japan) in  
191 accordance with the manufacturer's instruction. The total RNA (2.5  $\mu$ g) was reverse-  
192 transcribed by using a SuperScript IN VILO Master Mix with ezDNase Enzyme (Invitrogen,  
193 Carlsbad, CA, United States). Quantitative real-time PCR was performed with a Mx3000P  
194 (Agilent Technologies, Santa Clara, CA, United States) with SYBR Green detection. For  
195 reaction mixture preparation, Thunderbird Next SYBR qPCR Mix (Toyobo Co., Ltd., Osaka,  
196 Japan) was used. Primers used for quantitative PCR are listed in Table S1. An equivalent

197 amount of cDNA, obtained from reverse transcription reactions using an equivalent amount of  
198 total RNA, was applied to each reaction mixture. The gene encoding histone H2B was used as  
199 a normalization reference (an internal control) for determining the target gene expression  
200 ratios.

### 201 **Delipidization and fractionation of mycelial cells**

202 Cell walls were fractionated as previously described with some modification (Miyazawa et  
203 al., 2018). Mycelia cultured for 24 h in CD medium were collected by filtering through  
204 Miracloth (Merck Millipore, Darmstadt, Germany), washed with water, and freeze-dried. The  
205 mycelia were then pulverized in a MM400 bench-top mixer mill (Retch, Haan, Germany).  
206 The powder (1 g) was suspended in 25 mL of chloroform–methanol (3:1 vol/vol) and stirred  
207 at room temperature for 12 h to remove the total polar lipid content of the mycelial cells. The  
208 mixture was centrifuged ( $10 \times 1000 \times g$ , 10 min). The residue was suspended in chloroform–  
209 methanol, and the delipidizing procedure was repeated. Then the de-polar lipid residue was  
210 suspended in 40 mL of 0.1 M Na phosphate buffer (pH 7.0), and cell-wall components were  
211 fractionated by hot-water and alkali treatments, as described previously (Miyazawa et al.,  
212 2018). Hot-water–soluble, alkali-soluble, and alkali-insoluble fractions were obtained from  
213 this fractionation, and the alkali-soluble fraction was further separated into a fraction soluble  
214 in water at neutral pH (AS1) and an insoluble fraction (AS2). The monosaccharide  
215 composition of AS2 fractions was quantified according to Miyazawa et al. (2018).

216 To obtain mycelia cultured for 16 h, conidia (final conc.  $5.0 \times 10^5/\text{mL}$ ) were inoculated  
217 into 200 mL CD medium and rotated at 160 rpm at 37°C. The mycelia were collected and  
218 fractionated as described above.

### 219 **<sup>13</sup>C NMR analysis**

220 The AS2 fraction of each strain (50 mg) was suspended in 1 mL of 1 M NaOH/D<sub>2</sub>O and  
221 dissolved by vortexing. One drop of DMSO-d<sub>6</sub> (deuterated dimethyl sulfoxide) was then  
222 added to each fraction and the solutions were centrifuged ( $3,000 \times g$ , 5 min) to remove  
223 insoluble debris. <sup>13</sup>C NMR spectra of the supernatants were obtained using a JNM-ECX400P  
224 spectrometer (JEOL, Tokyo, Japan) at 400 MHz at 35°C. Chemical shifts were recorded  
225 relative to the resonance of DMSO-d<sub>6</sub>.

### 226 **Determination of the average molecular mass of alkali-soluble glucan**

227 The MM of alkali-soluble glucan was determined by gel permeation chromatography (GPC)  
228 according to the methods of Puanglek et al. (2016), with some modification. A GPC-101

229 system (Showa Denko Co. Ltd., Tokyo, Japan) with an ERC-3125S degasser (Showa Denko)  
230 and an RI-71S refractive index detector (Showa Denko) was used for the measurement. It was  
231 fitted with a GPC KD-G 4A guard column (Showa Denko) and a GPC KD-805 column (8.0 ×  
232 300 mm; Showa Denko). The eluent was 20 mM LiCl in *N,N*-dimethylacetamide (DMAc),  
233 and the flow rate was 0.6 mL/min at 40°C. The detector was normalized with polystyrene  
234 standards (SM-105; Showa Denko). With SmartChrom software (Jasco, Tokyo, Japan), the  
235 GPC profile was divided into virtual time slices ( $n_i$ ) with the height of each virtual slice from  
236 the base line ( $H_i$ ) corresponding to a certain MM ( $M_i$ ) obtained by calibrating the column.  
237 From these values, the number-average MM ( $M_n$ ) and weight-average MM ( $M_w$ ) were  
238 calculated as:

$$239 \quad M_n = \sum H_i / \sum (H_i / M_i)$$
$$240 \quad M_w = \sum (H_i \cdot M_i) / \sum H_i$$

241 Polydispersity was calculated as  $M_w/M_n$ .

## 242 **Smith degradation**

243 Smith degradation of the alkali-soluble glucan was performed as described (Miyazawa et al.,  
244 2018).

## 245 **Fluorescent labeling of cell-wall polysaccharides**

246 Mycelial cells cultured for 16 h in CD liquid medium were dropped on a glass slide and dried  
247 at 55°C for 15 min. The cells were fixed, labeled with fluorophores, and imaged by confocal  
248 scanning microscopy as described (Miyazawa et al., 2018). Enzymatic digestion of  $\beta$ -1,3-  
249 glucan in the hyphal cells was performed as described (Miyazawa et al., 2018).

## 250 **Results**

### 251 **Characterization of strains with disrupted or overexpressed *amyD***

252 We constructed *amyD*<sup>OE</sup> and  $\Delta$ *amyD* strains by introducing the *amyD* cassettes for  
253 overexpression and disruption into the wild-type, *agsA*<sup>OE</sup>, and *agsB*<sup>OE</sup> strains (Fig. S2). The  
254 expression level of *amyD* in each strain was quantified in hyphal cells. Whereas each  
255 disrupted strain ( $\Delta$ *amyD*, *agsA*<sup>OE</sup>  $\Delta$ *amyD*, and *agsB*<sup>OE</sup>  $\Delta$ *amyD*) showed scarce *amyD*  
256 expression, each overexpressing strain (*amyD*<sup>OE</sup>, *agsA*<sup>OE</sup> *amyD*<sup>OE</sup>, and *agsB*<sup>OE</sup> *amyD*<sup>OE</sup>)  
257 showed significantly higher *amyD* expression than the parental strains (Fig. 1).

258 There was no significant difference in radial growth among the strains grown on agar  
259 plates for 5 days (Fig. S4). In liquid culture, the wild-type and  $\Delta$ *amyD* strains formed tightly



260 aggregated hyphal pellets; however, the hyphae of the *amyD*<sup>OE</sup> strain were almost fully  
261 dispersed (Fig. 2). He et al. reported that the phenotype of their *amyD*<sup>OE</sup> strain resembles that  
262 of the  $\Delta$ *agsB* strain in *A. nidulans* (He et al., 2014), which is consistent with our results (Fig.  
263 2). In agreement with our previous results (Miyazawa et al., 2018), the *agsA*<sup>OE</sup> and *agsB*<sup>OE</sup>  
264 strains formed, respectively, loosely and tightly aggregated pellets (Fig. 2). Disruption of  
265 *amyD* did not affect the phenotypes of the *agsA*<sup>OE</sup> and *agsB*<sup>OE</sup> strains (Fig. 2). Also,  
266 overexpression of *amyD* scarcely affected the phenotypes of the *agsA*<sup>OE</sup> and *agsB*<sup>OE</sup> strains  
267 (Fig. 2).

### 268 **Overexpression of *amyD* resulted in a decrease in cell-wall alkali-soluble glucan**

269 Cell-wall components of each strain were fractionated by a hot water–alkali treatment  
270 method, each fraction was weighed, and the monosaccharide composition of the AS2 fraction  
271 was quantified. The amount of glucose in the AS2 fraction was significantly lower in the  
272 *amyD*<sup>OE</sup> strain than in the wild-type strain (Fig. 3A;  $P < 0.05$ ). That in the  $\Delta$ *amyD* strain was  
273 similar to that in the wild-type strain (Fig. 3A). Those in the *agsA*<sup>OE</sup> *amyD*<sup>OE</sup> and  
274 *agsA*<sup>OE</sup>  $\Delta$ *amyD* strains, which were constructed from the parental strain *agsA*<sup>OE</sup>, were almost  
275 the same (Fig. 3B). It was significantly lower in the *agsB*<sup>OE</sup> *amyD*<sup>OE</sup> strain than in the *agsB*<sup>OE</sup>  
276 and *agsB*<sup>OE</sup>  $\Delta$ *amyD* strains (Fig. 3C;  $P < 0.05$ ). These results indicate that AmyD acts to  
277 decrease the amount of alkali-soluble glucan in the wild-type and *agsB*<sup>OE</sup> strains, but not in  
278 the *agsA*<sup>OE</sup> strain, even when *amyD* is overexpressed.

### 279 **Overexpression of the *amyD* gene decreases the molecular mass of alkali-soluble glucan**

280 By <sup>13</sup>C NMR analysis, the primary component in the AS2 fraction of the wild-type, *amyD*<sup>OE</sup>,  
281 and  $\Delta$ *amyD* strains was found to be  $\alpha$ -1,3-glucan, suggesting that *amyD* did not affect the  
282 primary components of alkali-soluble glucan (Fig. S5). To reveal whether the MM of alkali-  
283 soluble glucan was affected by disruption or overexpression of *amyD*, we determined the MM  
284 of alkali-soluble glucan in each strain by GPC analysis. Polystyrene (MM, 13□900–  
285 3□850□000) was used as a standard molecule to calibrate the column for size exclusion  
286 analysis. Although the physical properties of a polymer depend on  $M_w$ , the number of moles is  
287 important for a biological reaction. Here we focus on the MM of alkali-soluble glucan with  
288  $M_n$ . The  $M_n$  of the alkali-soluble glucan was 1□260□000 ± 270□000 in the *agsA*<sup>OE</sup> strain and  
289 312□000 ± 3□000 in *agsB*<sup>OE</sup> strain (Fig. 4A, B; Table 2), consistent with our previous results  
290 (Miyazawa et al., 2018). Although the  $M_n$  of alkali-soluble glucan in the *agsA*<sup>OE</sup> *amyD*<sup>OE</sup>  
291 strain (1□110□000 ± 60□000) was similar to that in the parental (*agsA*<sup>OE</sup>) strain, that of  
292 *agsA*<sup>OE</sup>  $\Delta$ *amyD* was significantly greater (2□250□000 ± 130□000) than that of *agsA*<sup>OE</sup> (Fig.

293 4A; Table 2,  $P < 0.05$ ). In addition, the  $M_n$  of *agsB<sup>OE</sup> amyD<sup>OE</sup>* ( $140 \square 000 \pm 4 \square 000$ ) was  
294 significantly less than that of the parental (*agsB<sup>OE</sup>*) strain (Fig. 4B; Table 2,  $P < 0.05$ ). The  $M_n$   
295 of alkali-soluble glucan in *agsB<sup>OE</sup>  $\Delta$ amyD* ( $358 \square 000 \pm 11 \square 000$ ) was similar to that in *agsB<sup>OE</sup>*  
296 (Fig. 4B; Table 2). Lastly, the  $M_n$  of alkali-soluble glucan in the wild type ( $2 \square 280 \square 000 \pm$   
297  $130 \square 000$ ) and  *$\Delta$ amyD* ( $2 \square 390 \square 000 \pm 390 \square 000$ ) was larger than that in *agsB<sup>OE</sup>* ( $312 \square 000 \pm$   
298  $3 \square 000$ ; Fig. 4C; Table 2). The *amyD<sup>OE</sup>* strain had a primary peak at around 17 min ( $M_n^1$ ,  
299  $32 \square 900 \pm 300$ ) and a secondary peak at 11 min ( $M_n^2$ ,  $2 \square 210 \square 000 \pm 700 \square 000$ ). These results  
300 suggest that AmyD degraded the alkali-soluble glucan eluted around 11 min to produce  
301 alkali-soluble glucan with a smaller MM (Fig. 4C; Table 2).

302 We predicted that an unknown modification enzyme may increase the MM of alkali-  
303 soluble glucan in the endogenous *agsB*-expressing strain because the alkali-soluble glucan in  
304 these strains was synthesized mainly by AgsB. Therefore, we determined the MM of alkali-  
305 soluble glucan extracted from 16-h cultured mycelia, which should be less affected by the  
306 modification enzyme than the 24-h cultured mycelia (He et al., 2017). Unexpectedly, the  $M_n$   
307 of the alkali-soluble glucan in the mycelia cultured for 16 h was  $1 \square 980 \square 000 \pm 320 \square 000$ ,  
308 which was similar to that in the mycelia cultured for 24 h ( $1 \square 930 \square 000 \pm 280 \square 000$ ; Fig. S6;  
309 Table S2). We then evaluated the MM of alkali-soluble glucan in A4, which had  $M_n =$   
310  $2 \square 224 \square 000 \pm 390 \square 000$ , similar to that in the wild-type strain (Table S3).

311 To validate whether the degree of polymerization of  $\alpha$ -1,3-glucan subunits in the alkali-  
312 soluble glucan was altered when the MM was changed by *amyD* disruption or overexpression,  
313 we applied Smith degradation to the alkali-soluble glucan from each strain to selectively  
314 cleave 1,4-linked glucan, and then determined the MM by GPC. One subunit of  $\alpha$ -1,3-glucan  
315 in the alkali-soluble glucan is composed of  $\approx 200$  glucose residues (Choma et al.,  
316 2013; Miyazawa et al., 2018). The Smith-degraded alkali-soluble glucan in each strain had  
317 almost the same MM, equivalent to 300–400 glucose residues (Fig. S7; Table S4), which  
318 suggests that AmyD activity does not decrease the degree of polymerization of the glucose  
319 residues in each  $\alpha$ -1,3-glucan subunit.

### 320 **Spatial localization of $\alpha$ -1,3-glucan in the cell wall is not affected by *amyD* disruption or** 321 **overexpression**

322 We previously revealed that spatial localization of  $\alpha$ -1,3-glucan in the cell wall changes  
323 according to its MM (Miyazawa et al., 2018);  $\alpha$ -1,3-glucans in *agsB<sup>OE</sup>* cells are localized in  
324 the outer layer in the cell wall, whereas most of those in the *agsA<sup>OE</sup>* cells are masked by a  $\beta$ -  
325 1,3-glucan layer. In this study, disruption or overexpression of *amyD* altered the MM of

326 alkali-soluble glucan (Fig. 4; Table 2); therefore, we analyzed whether this alteration affected  
327 the spatial localization of  $\alpha$ -1,3-glucan in the cell wall. In agreement with previous results  
328 (Miyazawa et al., 2018), the  $\alpha$ -1,3-glucans with AGBD-GFP labeling showed clearly in the  
329 wild-type and *agsB*<sup>OE</sup> cells, but only weakly in *agsA*<sup>OE</sup> cells (Fig. 5). The  $\Delta$ *amyD* and *amyD*<sup>OE</sup>  
330 cells were also labeled with AGBD-GFP (Fig. 5); fluorescent intensity in *amyD*<sup>OE</sup> was  
331 relatively low, which might be caused by a decrease in the amount of alkali-soluble glucan in  
332 the cell wall of *amyD*<sup>OE</sup> cells. The labeling with AGBD-GFP in *agsA*<sup>OE</sup> *amyD*<sup>OE</sup> and  
333 *agsA*<sup>OE</sup>  $\Delta$ *amyD* cells was weak, as was that in the cells of the parental *agsA*<sup>OE</sup> strain (Fig. 5).  
334 The *agsB*<sup>OE</sup>  $\Delta$ *amyD* cells were clearly labeled with AGBD-GFP, as in the parental *agsB*<sup>OE</sup>  
335 (Fig. 5). The AGBD-GFP labeling was slightly weaker in *agsB*<sup>OE</sup> *amyD*<sup>OE</sup> than in *agsB*<sup>OE</sup>,  
336 which might be attributable to a decrease in the amount of  $\alpha$ -1,3-glucan. After treatment with  
337  $\beta$ -1,3-glucanase,  $\alpha$ -1,3-glucans of the hyphal cells in *agsA*<sup>OE</sup>, *agsA*<sup>OE</sup> *amyD*<sup>OE</sup>, and  
338 *agsA*<sup>OE</sup>  $\Delta$ *amyD* cells were clearly labeled with AGBD-GFP (Fig. S8), suggesting that these  
339 strains have  $\alpha$ -1,3-glucan in the inner layer of the cell wall in their hyphal cells. Taken  
340 together, these findings indicate that disruption or overexpression of *amyD* gene scarcely  
341 affected the spatial localization of  $\alpha$ -1,3-glucan in the cell wall.

#### 342 **The GPI anchor is essential for the effect of AmyD on both the amount and molecular** 343 **mass of alkali-soluble glucan**

344 AmyD is thought to contain a GPI anchor at the C-terminal region. Fungal GPI anchor-type  
345 proteins are transferred from the plasma membrane to the cell wall by the activity of the  
346 GH76 family (Vogt et al., 2020). We speculated that localization in the cell wall would be  
347 essential for AmyD to reach the substrate, alkali-soluble glucan, so we constructed  
348 overexpression strains of *amyD* with and without the GPI-anchor site. Because we noticed  
349 that overexpression of *amyD* alters the phenotype or the alkali-soluble glucan, we used  
350  $\Delta$ *amyD* and *agsB*<sup>OE</sup>  $\Delta$ *amyD* strains as hosts for the *amyD*<sup>OE</sup> strains. The hyphae of  $\Delta$ *amyD*  
351 formed pellets in shake-flask culture (Fig. 6). Those of  $\Delta$ *amyD*-*amyD*<sup>OE</sup> were dispersed, as in  
352 *amyD*<sup>OE</sup> (Fig. 6). Those of  $\Delta$ *amyD*-*amyD*<sup>OE</sup>( $\Delta$ GPI) formed pellets, although the form was  
353 slightly different from that in the parental strain (Fig. 6). Those of *agsB*<sup>OE</sup>  $\Delta$ *amyD*,  
354 *agsB*<sup>OE</sup>  $\Delta$ *amyD*-*amyD*<sup>OE</sup>, and *agsB*<sup>OE</sup>  $\Delta$ *amyD*-*amyD*<sup>OE</sup>( $\Delta$ GPI) formed similar pellets (Fig. 6).  
355 Although the  $\Delta$ *amyD*-*amyD*<sup>OE</sup> hyphae had less AS2-Glc (1.13%  $\pm$  0.21%) than  $\Delta$ *amyD*  
356 (5.68%  $\pm$  0.25%), the amount was restored in  $\Delta$ *amyD*-*amyD*<sup>OE</sup>( $\Delta$ GPI) hyphae (5.17%  $\pm$   
357 0.46%; Fig. 7A). These results suggest that the GPI anchor of AmyD has an important  
358 negative effect on  $\alpha$ -1,3-glucan biosynthesis. The hyphae of *agsB*<sup>OE</sup>  $\Delta$ *amyD*-*amyD*<sup>OE</sup> had

359 marginally less AS2-Glc ( $16.2\% \pm 0.6\%$ ) than those of *agsB<sup>OE</sup> ΔamyD* ( $17.6\% \pm 0.3\%$ ) and  
360 *agsB<sup>OE</sup> ΔamyD-amyD<sup>OE</sup>(ΔGPI)* ( $16.7\% \pm 0.5\%$ ; Fig. 7B). We then evaluated the MM of  
361 alkali-soluble glucan in the cells of *agsB<sup>OE</sup> ΔamyD*, *agsB<sup>OE</sup> ΔamyD-amyD<sup>OE</sup>*, and  
362 *agsB<sup>OE</sup> ΔamyD-amyD<sup>OE</sup>(ΔGPI)*. The  $M_n$  of the alkali-soluble glucan in *agsB<sup>OE</sup> ΔamyD-*  
363 *amyD<sup>OE</sup>* cells ( $174 \square 000 \pm 8 \square 000$ ) was smaller than that in *agsB<sup>OE</sup> ΔamyD* ( $270 \square 000 \pm$   
364  $8 \square 000$ ; Fig. 7C; Table 3;  $P < 0.05$ ). The  $M_n$  of alkali-soluble glucan in *agsB<sup>OE</sup> ΔamyD-*  
365 *amyD<sup>OE</sup>(ΔGPI)* cells ( $349 \square 000 \pm 42 \square 000$ ) was similar to that in *agsB<sup>OE</sup> ΔamyD* (Fig. 7C;  
366 Table 3). These results suggest that the GPI anchor of AmyD is also important for regulating  
367 the MM of alkali-soluble glucan.

## 368 Discussion

369 Although the GPI-anchored  $\alpha$ -amylase AmyD is known to be involved in the biosynthesis of  
370  $\alpha$ -1,3-glucan in *A. nidulans* (He et al., 2014; He et al., 2017), the detailed mechanism remains  
371 unclear. Here, we looked at strains with disrupted or overexpressed *amyD* to analyze how  
372 AmyD affects the chemical properties of alkali-soluble glucan. The results reveal that  
373 overexpression of *amyD* not only decreased the MM of  $\alpha$ -1,3-glucan, but also decreased the  
374 amount of  $\alpha$ -1,3-glucan in the cell wall. The GPI anchor of AmyD was essential in both  
375 actions.

376 Overexpression of *amyD* affected the amount and MM of  $\alpha$ -1,3-glucan in the wild-type  
377 and *agsB<sup>OE</sup>* strains, but not in the *agsA<sup>OE</sup>* strain (Fig. 3; Fig. 4; Table 2). We previously  
378 reported that the MM of  $\alpha$ -1,3-glucan controls where  $\alpha$ -1,3-glucan is localized in the cell wall  
379 of *A. nidulans*; namely, that the  $\alpha$ -1,3-glucan with a larger MM that is synthesized by AgsA is  
380 localized in the inner layer of the cell wall, and the smaller one that is synthesized by AgsB is  
381 localized in the outer layer (Miyazawa et al., 2018). This phenomenon is explained by the fact  
382 that fungal GPI-anchored proteins are transferred from the plasma membrane to the cell wall  
383 (Orlean, 2012; Gow et al., 2017). The findings here suggest that AmyD decreased the MM of  
384  $\alpha$ -1,3-glucan localized at the outer layer of the cell wall. The increased MM of alkali-soluble  
385 glucan in the *agsA<sup>OE</sup> ΔamyD* strain can be explained by its GPC elution profiles which  
386 suggest that the MM of the polysaccharides was broadly distributed (Fig. 4A); in other words,  
387 *agsA<sup>OE</sup> ΔamyD* had mainly  $\alpha$ -1,3-glucan with larger MM ( $>623 \square 000$  [ $M_p$  of alkali-soluble  
388 glucan from *agsB<sup>OE</sup>*], 97.5%), but also had a small amount of  $\alpha$ -1,3-glucan with small MM  
389 ( $<623 \square 000$ , 2.5%). We speculate that this small amount of  $\alpha$ -1,3-glucan with a smaller MM  
390 may be localized in the outer layer of the cell wall of *agsA<sup>OE</sup>*, where it is accessible to AmyD,  
391 which results in the relatively smaller MM of  $\alpha$ -1,3-glucan. Immunoelectron microscopic

392 analysis would be able to reveal the relationship between the spatial localization of AmyD  
393 and  $\alpha$ -1,3-glucan in the cell wall.

394 AmyD of *A. nidulans* is considered to be a GPI-anchored protein (de Groot et al.,  
395 2009;He et al., 2014). It is well known that many fungal GPI-anchored proteins are related to  
396 remodeling of the cell wall (Samalova et al., 2020). Proteins in the “defective in filamentous  
397 growth” (DFG) family recognize the GPI core glycan and then transfer to the  $\beta$ -1,3- or  $\beta$ -1,6-  
398 glucan (Muszkieta et al., 2019;Vogt et al., 2020), which allows GPI-anchored proteins to react  
399 with their substrates in the cell wall. Although there is no direct evidence that DFG family  
400 proteins contribute to transglycosylation in *Aspergillus* species, their role in cell-wall integrity  
401 in *A. fumigatus* was recently reported (Li et al., 2018;Muszkieta et al., 2019), which implies  
402 that DFG family proteins are important for transferring the GPI-core glycan to  $\beta$ -glucan in  
403 *Aspergillus* species. To reveal the importance of the GPI anchor in the function of AmyD, we  
404 evaluated the MM and amount of  $\alpha$ -1,3-glucan in *amyD*-overexpressing strains with or  
405 without the GPI-anchoring site. Interestingly, decreases in the MM and the amount of  $\alpha$ -1,3-  
406 glucan were not observed when the C-terminal GPI-anchoring site was deleted (Fig. 7; Table  
407 3);  $\Delta amyD$ -*amyD*<sup>OE</sup>( $\Delta$ GPI) formed slightly altered pellets (Fig. 6), suggesting that AmyD  
408 expressed without its GPI anchor has only partial functions. Above all, the results show that  
409 expression of AmyD with a GPI anchor is important for reaching the substrate,  $\alpha$ -1,3-glucan,  
410 in the space of the cell wall.

411 Cell-wall polysaccharides are thought to be synthesized on the plasma membrane after  
412 the secretory vesicles containing polysaccharide synthases have been exported to the hyphal  
413 tip (Riquelme, 2013). On the basis of our previous findings (Miyazawa et al., 2020), we  
414 hypothesize the process of alkali-soluble glucan biosynthesis of *A. nidulans* to be as follows:  
415 (1) the intracellular domain of  $\alpha$ -1,3-glucan synthase polymerizes 1,3-linked  $\alpha$ -glucan chains  
416 from UDP-glucose as a substrate from the primers, which are maltooligosaccharides produced  
417 by intracellular  $\alpha$ -amylase AmyG; (2) the elongated glucan chain is exported to the  
418 extracellular space through the multitransmembrane domain of  $\alpha$ -1,3-glucan synthase; (3) the  
419 extracellular domain of  $\alpha$ -1,3-glucan connects several chains of the elongated glucan to form  
420 mature alkali-soluble glucan. The mechanism underlying the distribution of mature alkali-  
421 soluble glucan to the cell-wall network is still unknown. However, the water solubility of  
422 newly synthesized glucan might be related to the spatial distribution of  $\alpha$ -1,3-glucan in the  
423 cell wall, because localization of  $\alpha$ -1,3-glucan varies according to the difference in MM  
424 (Miyazawa et al., 2018). *Aspergillus niger* AgtA (encoded by an orthologue of *A. nidulans*  
425 *amyD*) scarcely hydrolyzes  $\alpha$ -1,3-glucan and shows weak hydrolytic activity to starch (van

426 der Kaaij et al., 2007). Therefore, decrease of the MM of alkali-soluble glucan in the *amyD*<sup>OE</sup>  
427 strain could be caused by hydrolysis of the primer/spacer residues (1,4-linked  $\alpha$ -glucan) rather  
428 than of the 1,3-linked  $\alpha$ -glucan region. The mechanism underlying the decrease in the amount  
429 of  $\alpha$ -1,3-glucan by AmyD is also unknown. He et al. reported that AmyD seems to directly  
430 repress  $\alpha$ -1,3-glucan synthesis (He et al., 2017). We suspect that AmyD with a GPI anchor on  
431 the plasma membrane binds to the spacer residues of a glucan chain that is being just  
432 synthesized by  $\alpha$ -1,3-glucan synthase, and competitively inhibits transglycosylation by the  
433 extracellular domain of  $\alpha$ -1,3-glucan synthase to decrease the amount of alkali-soluble glucan  
434 in the cell wall.

435 The  $M_n$  of the alkali-soluble glucan from the wild-type strain was larger than that from  
436 the *agsB*<sup>OE</sup>, although the alkali-soluble glucan from both strains seemed to be synthesized  
437 mainly by AgsB (Fig. 4; Table 2). The  $M_n$  of the alkali-soluble glucan in the 16-h-cultured  
438 mycelia from the wild-type was similar to that from the 24-h-cultured mycelia (Fig. S6; Table  
439 S2).  $\alpha$ -1,3-Glucan was clearly labeled with AGBD-GFP in the wild-type strain (Fig. 5). These  
440 results suggest that  $\alpha$ -1,3-glucan was located in the outer layer of the cell wall in the wild-type  
441 strain, consistent with the localization of  $\alpha$ -1,3-glucan synthesized by AgsB. These results  
442 imply the existence of some factor that increases the MM of  $\alpha$ -1,3-glucan. We surmise that  
443 once a matured  $\alpha$ -1,3-glucan molecule synthesized by AgsB is localized in the outer layer of  
444 the cell wall, macromolecules are formed by interconnecting  $\alpha$ -1,3-glucan or connecting  $\alpha$ -  
445 1,3-glucan to other polysaccharides, resulting in a chemically stable complex. Although the  
446 difference was not significant, the MM of Smith-degraded alkali-soluble glucan in the wild-  
447 type strain was slightly higher (Table S4) and its GPC profile had a broader distribution (Fig.  
448 S7) than those in the *agsA*<sup>OE</sup> and *agsB*<sup>OE</sup> strains, implying the existence of non-Smith-  
449 degradable glycosidic bonds (i.e.  $\beta$ -1,3-glycosidic bond) in the alkali-soluble fraction in the  
450 wild-type strain. It is well known that  $\beta$ -glucan, chitin, and galactomannan are continuously  
451 modified by hydrolase or glycosyltransferase in the cell wall (Aimanianda et al., 2017; Henry  
452 et al., 2019; Muszkieta et al., 2019). However, an enzyme that modifies  $\alpha$ -1,3-glucan has not  
453 been reported. Recently the GPI-anchored glycosyltransferase Crh, which has a role in the  
454 crosslinking reaction for both glucan–glucan and glucan–chitin, has been reported (Fang et  
455 al., 2019). A similar enzyme that has a role in modifying  $\alpha$ -1,3-glucan might be found soon.

456 Here, we revealed that AmyD in *A. nidulans* decreased the MM of the alkali-soluble  
457 glucan composed mainly of  $\alpha$ -1,3-glucan in the cell wall and the amount of alkali-soluble  
458 glucan. However, a complete picture of the biosynthesis of  $\alpha$ -1,3-glucan has yet to be  
459 described, because the substrates or proteins associated with  $\alpha$ -1,3-glucan synthesis have not

460 been directly demonstrated. To unveil the true nature of the biosynthesis, further biochemical  
461 analysis of the  $\alpha$ -1,3-glucan synthase is essential.

## 462 **Conflict of interest**

463 The authors declare that the research was conducted in the absence of any commercial or  
464 financial relationships that could be construed as a potential conflict of interest.

## 465 **Author contributions**

466 KM, AY, TN, and KA conceived and designed the experiment. KM, TY, and AT performed  
467 most experiments and analyzed the data. KM, YK, and YT performed microscopic  
468 observation. KM, AY, MS, and YY constructed fungal mutants. SK performed  $^{13}\text{C}$  NMR. AK  
469 and SY produced AGBD-GFP. KM, AY, and KA wrote the paper. KA supervised this  
470 research and acquired funding.

## 471 **Funding**

472 This work was supported by the Japan Society for Promotion of Science (JSPS) KAKENHI  
473 Grant numbers 26292037 (KA), 18K05384 (KA), and 20K22773 (KM), and a Grant-in-Aid  
474 for JSPS Fellows Grant Number 18J11870 (KM). This work was also supported by the  
475 Institute for Fermentation, Osaka (Grant No. L-2018-2-014) (KA) and by the project  
476 JPNP20011 (KA), which is commissioned by the New Energy and Industrial Technology  
477 Development Organization (NEDO).

## 478 **Acknowledgment**

479 We are grateful to Associate Professor Toshikazu Komoda (Miyagi University) for the NMR.

## 480 **References**

- 481 Aimanianda, V., Simenel, C., Garnaud, C., Clavaud, C., Tada, R., Barbin, L., Mouyna, I.,  
482 Heddergott, C., Popolo, L., Ohya, Y., Delepierre, M., and Latge, J.P. (2017). The dual  
483 activity responsible for the elongation and branching of  $\beta$ -(1,3)-glucan in the fungal  
484 cell wall. *mBio* 8.
- 485 Beauvais, A., Bozza, S., Kniemeyer, O., Formosa, C., Balloy, V., Henry, C., Roberson, R.W.,  
486 Dague, E., Chignard, M., Brakhage, A.A., Romani, L., and Latgè, J.P. (2013). Deletion  
487 of the  $\alpha$ -(1,3)-glucan synthase genes induces a restructuring of the conidial cell wall  
488 responsible for the avirulence of *Aspergillus fumigatus*. *PLoS Pathog.* 9, e1003716.
- 489 Beauvais, A., Maubon, D., Park, S., Morelle, W., Tanguy, M., Huerre, M., Perlin, D.S., and  
490 Latge, J.P. (2005). Two  $\alpha$ (1-3) glucan synthases with different functions in *Aspergillus*  
491 *fumigatus*. *Appl. Environ. Microbiol.* 71, 1531-1538.

- 492 Bernard, M., and Latge, J.P. (2001). *Aspergillus fumigatus* cell wall: composition and  
493 biosynthesis. *Med. Mycol.* 39 Suppl 1, 9-17.
- 494 Choma, A., Wiater, A., Komaniecka, I., Paduch, R., Pleszczyńska, M., and Szczodrak, J.  
495 (2013). Chemical characterization of a water insoluble (1→3)- $\alpha$ -D-glucan from an  
496 alkaline extract of *Aspergillus wentii*. *Carbohydr. Polym.* 91, 603-608.
- 497 Damveld, R.A., Vankuyk, P.A., Arentshorst, M., Klis, F.M., Van Den Hondel, C.A., and Ram,  
498 A.F. (2005). Expression of *agsA*, one of five 1,3- $\alpha$ -D-glucan synthase-encoding genes  
499 in *Aspergillus niger*, is induced in response to cell wall stress. *Fungal Genet. Biol.* 42,  
500 165-177.
- 501 De Groot, P.W.J., Brandt, B.W., Horiuchi, H., Ram, A.F.J., De Koster, C.G., and Klis, F.M.  
502 (2009). Comprehensive genomic analysis of cell wall genes in *Aspergillus nidulans*.  
503 *Fungal Genetics and Biology* 46, S72-S81.
- 504 Dichtl, K., Samantaray, S., Aimaniananda, V., Zhu, Z., Prevost, M.C., Latgè, J.P., Ebel, F., and  
505 Wagener, J. (2015). *Aspergillus fumigatus* devoid of cell wall  $\beta$ -1,3-glucan is viable,  
506 massively sheds galactomannan and is killed by septum formation inhibitors. *Mol.*  
507 *Microbiol.* 95, 458-471.
- 508 Fang, W., Sanz, A.B., Bartual, S.G., Wang, B., Ferenbach, A.T., Farkas, V., Hurtado-Guerrero,  
509 R., Arroyo, J., and Van Aalten, D.M.F. (2019). Mechanisms of redundancy and  
510 specificity of the *Aspergillus fumigatus* Crh transglycosylases. *Nat. Commun.* 10, 1669.
- 511 Fontaine, T., Beauvais, A., Loussert, C., Thevenard, B., Fulgsang, C.C., Ohno, N., Clavaud,  
512 C., Prevost, M.C., and Latgè, J.P. (2010). Cell wall  $\alpha$ 1-3glucans induce the  
513 aggregation of germinating conidia of *Aspergillus fumigatus*. *Fungal Genet. Biol.* 47,  
514 707-712.
- 515 Fontaine, T., Simenel, C., Dubreucq, G., Adam, O., Delepierre, M., Lemoine, J., Vorgias, C.E.,  
516 Diaquin, M., and Latgè, J.P. (2000). Molecular organization of the alkali-insoluble  
517 fraction of *Aspergillus fumigatus* cell wall. *J. Biol. Chem.* 275, 27594-27607.
- 518 Fujikawa, T., Kuga, Y., Yano, S., Yoshimi, A., Tachiki, T., Abe, K., and Nishimura, M. (2009).  
519 Dynamics of cell wall components of *Magnaporthe grisea* during infectious structure  
520 development. *Mol. Microbiol.* 73, 553-570.
- 521 Fujikawa, T., Sakaguchi, A., Nishizawa, Y., Kouzai, Y., Minami, E., Yano, S., Koga, H.,  
522 Meshi, T., and Nishimura, M. (2012). Surface  $\alpha$ -1,3-glucan facilitates fungal stealth  
523 infection by interfering with innate immunity in plants. *PLoS Pathog.* 8, e1002882.
- 524 Fujioka, T., Mizutani, O., Furukawa, K., Sato, N., Yoshimi, A., Yamagata, Y., Nakajima, T.,  
525 and Abe, K. (2007). MpkA-dependent and -independent cell wall integrity signaling in  
526 *Aspergillus nidulans*. *Eukaryot. Cell* 6, 1497-1510.
- 527 Gow, N.a.R., Latge, J.P., and Munro, C.A. (2017). The fungal cell wall: structure, biosynthesis,  
528 and function. *Microbiol. Spectr.* 5, FUNK-0035-2016.
- 529 Grün, C.H., Hochstenbach, F., Humbel, B.M., Verkleij, A.J., Sietsma, J.H., Klis, F.M.,  
530 Kamerling, J.P., and Vliegthart, J.F. (2005). The structure of cell wall  $\alpha$ -glucan from  
531 fission yeast. *Glycobiology* 15, 245-257.
- 532 Hagiwara, D., Asano, Y., Marui, J., Furukawa, K., Kanamaru, K., Kato, M., Abe, K.,  
533 Kobayashi, T., Yamashino, T., and Mizuno, T. (2007). The SskA and SrrA response  
534 regulators are implicated in oxidative stress responses of hyphae and asexual spores in  
535 the phosphorelay signaling network of *Aspergillus nidulans*. *Biosci. Biotechnol.*  
536 *Biochem.* 71, 1003-1014.
- 537 He, X., Li, S., and Kaminskyj, S. (2017). An amylase-like protein, AmyD, is the major  
538 negative regulator for  $\alpha$ -glucan synthesis in *Aspergillus nidulans* during the asexual  
539 life cycle. *Int'l. J. Mol. Sci.* 18, 695.
- 540 He, X.X., Li, S.N., and Kaminskyj, S.G.W. (2014). Characterization of *Aspergillus nidulans*  
541  $\alpha$ -glucan synthesis: roles for two synthases and two amylases. *Mol. Microbiol.* 91,



- 542 579-595.
- 543 Henry, C., Latgè, J.P., and Beauvais, A. (2012).  $\alpha$ 1,3 Glucans are dispensable in *Aspergillus*  
544 *fumigatus*. *Eukaryot. Cell* 11, 26-29.
- 545 Henry, C., Li, J., Danion, F., Alcazar-Fuoli, L., Mellado, E., Beau, R., Jouvion, G., Latgè, J.P.,  
546 and Fontaine, T. (2019). Two KTR mannosyltransferases are responsible for the  
547 biosynthesis of cell wall mannans and control polarized growth in *Aspergillus*  
548 *fumigatus*. *mBio* 10, e02647-02618.
- 549 Krappmann, S., Sasse, C., and Braus, G.H. (2006). Gene targeting in *Aspergillus fumigatus* by  
550 homologous recombination is facilitated in a nonhomologous end- joining-deficient  
551 genetic background. *Eukaryot. Cell* 5, 212-215.
- 552 Latgè, J.P. (2010). Tasting the fungal cell wall. *Cell. Microbiol.* 12, 863-872.
- 553 Latgè, J.P., and Beauvais, A. (2014). Functional duality of the cell wall. *Curr. Opin. Microbiol.*  
554 20, 111-117.
- 555 Latgè, J.P., Beauvais, A., and Chamilos, G. (2017). The cell wall of the human fungal  
556 pathogen *Aspergillus fumigatus*: biosynthesis, organization, immune response, and  
557 virulence. *Annu. Rev. Microbiol.* 71, 99-116.
- 558 Li, J., Mouyna, I., Henry, C., Moyrand, F., Malosse, C., Chamot-Rooke, J., Janbon, G., Latgé,  
559 J.-P., and Fontaine, T. (2018). Glycosylphosphatidylinositol anchors from  
560 galactomannan and GPI-anchored protein are synthesized by distinct pathways in  
561 *Aspergillus fumigatus*. *J. Fungi* 4, 19.
- 562 Maubon, D., Park, S., Tanguy, M., Huerre, M., Schmitt, C., Prevost, M.C., Perlin, D.S., Latgè,  
563 J.P., and Beauvais, A. (2006). *AGS3*, an  $\alpha$ (1-3)glucan synthase gene family member of  
564 *Aspergillus fumigatus*, modulates mycelium growth in the lung of experimentally  
565 infected mice. *Fungal Genet. Biol.* 43, 366-375.
- 566 Miyazawa, K., Yoshimi, A., and Abe, K. (2020). The mechanisms of hyphal pellet formation  
567 mediated by polysaccharides,  $\alpha$ -1,3-glucan and galactosaminogalactan, in *Aspergillus*  
568 species. *Fungal Biol. Biotechnol.* 7, 10.
- 569 Miyazawa, K., Yoshimi, A., Kasahara, S., Sugahara, A., Koizumi, A., Yano, S., Kimura, S.,  
570 Iwata, T., Sano, M., and Abe, K. (2018). Molecular mass and localization of  $\alpha$ -1,3-  
571 glucan in cell wall control the degree of hyphal aggregation in liquid culture of  
572 *Aspergillus nidulans*. *Front. Microbiol.* 9, 2623.
- 573 Miyazawa, K., Yoshimi, A., Sano, M., Tabata, F., Sugahara, A., Kasahara, S., Koizumi, A.,  
574 Yano, S., Nakajima, T., and Abe, K. (2019). Both galactosaminogalactan and  $\alpha$ -1,3-  
575 glucan contribute to aggregation of *Aspergillus oryzae* hyphae in liquid culture. *Front.*  
576 *Microbiol.* 10, 2090.
- 577 Miyazawa, K., Yoshimi, A., Zhang, S., Sano, M., Nakayama, M., Gomi, K., and Abe, K.  
578 (2016). Increased enzyme production under liquid culture conditions in the industrial  
579 fungus *Aspergillus oryzae* by disruption of the genes encoding cell wall  $\alpha$ -1,3-glucan  
580 synthase. *Biosci. Biotechnol. Biochem.* 80, 1853-1863.
- 581 Muszkieta, L., Fontaine, T., Beau, R., Mouyna, I., Vogt, M.S., Trow, J., Cormack, B.P., Essen,  
582 L.-O., Jouvion, G., and Latgé, J.-P. (2019). The glycosylphosphatidylinositol-anchored  
583 *DFG* family is essential for the insertion of galactomannan into the  $\beta$ -(1,3)-glucan-  
584 chitin core of the cell wall of *Aspergillus fumigatus*. *mSphere* 4.
- 585 Orlean, P. (2012). Architecture and biosynthesis of the *Saccharomyces cerevisiae* cell wall.  
586 *Genetics* 192, 775-818.
- 587 Puanglek, S., Kimura, S., Enomoto-Rogers, Y., Kabe, T., Yoshida, M., Wada, M., and Iwata, T.  
588 (2016). *In vitro* synthesis of linear  $\alpha$ -1,3-glucan and chemical modification to ester  
589 derivatives exhibiting outstanding thermal properties. *Sci. Rep.* 6, 30479.
- 590 Rappleye, C.A., Eissenberg, L.G., and Goldman, W.E. (2007). *Histoplasma capsulatum*  $\alpha$ -  
591 (1,3)-glucan blocks innate immune recognition by the  $\beta$ -glucan receptor. *Proc. Natl.*

- 592 *Acad. Sci. U. S. A.* 104, 1366-1370.
- 593 Rappleye, C.A., Engle, J.T., and Goldman, W.E. (2004). RNA interference in *Histoplasma*  
594 *capsulatum* demonstrates a role for  $\alpha$ -(1,3)-glucan in virulence. *Mol. Microbiol.* 53,  
595 153-165.
- 596 Riquelme, M. (2013). Tip growth in filamentous fungi: A road trip to the apex. *Annu. Rev.*  
597 *Microbiol.* 67, 587-609.
- 598 Samalova, M., Carr, P., Bromley, M., Blatzer, M., Moya-Nilges, M., Latgé, J.P., and Mouyna,  
599 I. (2020). GPI anchored proteins in *Aspergillus fumigatus* and cell wall morphogenesis.  
600 *Curr. Top. Microbiol. Immunol.* 425, 167-186.
- 601 Sheppard, D.C., and Howell, P.L. (2016). Biofilm exopolysaccharides of pathogenic fungi:  
602 lessons from bacteria. *J. Biol. Chem.* 291, 12529-12537.
- 603 Stephen-Victor, E., Karnam, A., Fontaine, T., Beauvais, A., Das, M., Hegde, P., Prakhar, P.,  
604 Holla, S., Balaji, K.N., Kaveri, S.V., Latge, J.P., Aimanianda, V., and Bayry, J. (2017).  
605 *Aspergillus fumigatus* cell wall  $\alpha$ -(1,3)-glucan stimulates regulatory T-cell polarization  
606 by inducing PD-L1 expression on human dendritic cells. *J. Infect. Dis.* 216, 1281-  
607 1294.
- 608 Tokashiki, J., Hayashi, R., Yano, S., Watanabe, T., Yamada, O., Toyama, H., and Mizutani, O.  
609 (2019). Influence of  $\alpha$ -1,3-glucan synthase gene *agsE* on protoplast formation for  
610 transformation of *Aspergillus luchuensis*. *J. Biosci. Bioeng.* 128, 129-134.
- 611 Uechi, K., Yaguchi, H., Tokashiki, J., Taira, T., and Mizutani, O. (2021). Identification of  
612 genes involved in the synthesis of fungal cell wall component nigeran and regulation  
613 of its polymerization in *Aspergillus luchuensis*. *Appl. Environ. Microbiol.*,  
614 AEM0114421.
- 615 Van Der Kaaij, R.M., Yuan, X.L., Franken, A., Ram, A.F., Punt, P.J., Van Der Maarel, M.J.,  
616 and Dijkhuizen, L. (2007). Two novel, putatively cell wall-associated and  
617 glycosylphosphatidylinositol-anchored  $\alpha$ -glucanotransferase enzymes of *Aspergillus*  
618 *niger*. *Eukaryot. Cell* 6, 1178-1188.
- 619 Vogt, M.S., Schmitz, G.F., Varón Silva, D., Möscher, H.U., and Essen, L.O. (2020). Structural  
620 base for the transfer of GPI-anchored glycoproteins into fungal cell walls. *Proc. Natl.*  
621 *Acad. Sci. U. S. A.* 117, 22061-22067.
- 622 Yoshimi, A., Miyazawa, K., and Abe, K. (2016). Cell wall structure and biogenesis in  
623 *Aspergillus* species. *Biosci. Biotechnol. Biochem.* 80, 1700-1711.
- 624 Yoshimi, A., Miyazawa, K., and Abe, K. (2017). Function and biosynthesis of cell wall  $\alpha$ -1,3-  
625 glucan in fungi. *J. Fungi* 3, 63.
- 626 Yoshimi, A., Sano, M., Inaba, A., Kokubun, Y., Fujioka, T., Mizutani, O., Hagiwara, D.,  
627 Fujikawa, T., Nishimura, M., Yano, S., Kasahara, S., Shimizu, K., Yamaguchi, M.,  
628 Kawakami, K., and Abe, K. (2013). Functional analysis of the  $\alpha$ -1,3-glucan synthase  
629 genes *agsA* and *agsB* in *Aspergillus nidulans*: *AgsB* is the major  $\alpha$ -1,3-glucan synthase  
630 in this fungus. *PLoS One* 8, e54893.
- 631 Zhang, S., Ban, A., Ebara, N., Mizutani, O., Tanaka, M., Shintani, T., and Gomi, K. (2017a).  
632 Self-excising Cre/mutant *lox* marker recycling system for multiple gene integrations  
633 and consecutive gene deletions in *Aspergillus oryzae*. *J. Biosci. Bioeng.* 123, 403-411.
- 634 Zhang, S., Sato, H., Ichinose, S., Tanaka, M., Miyazawa, K., Yoshimi, A., Abe, K., Shintani,  
635 T., and Gomi, K. (2017b). Cell wall  $\alpha$ -1,3-glucan prevents  $\alpha$ -amylase adsorption onto  
636 fungal cell in submerged culture of *Aspergillus oryzae*. *J. Biosci. Bioeng.* 124, 47-53.  
637

638 **Table 1. Strains used in this study.**

| Strains                                                                              | Genotype                                                                                                                                                          | References                                     |
|--------------------------------------------------------------------------------------|-------------------------------------------------------------------------------------------------------------------------------------------------------------------|------------------------------------------------|
| A4                                                                                   |                                                                                                                                                                   | FGSC <sup>a</sup>                              |
| ABPU1 ( <i>argB</i> <sup>+</sup> )<br>(wild-type)                                    | <i>biA1, pyrG89, wA3, argB2, pyroA4, veA1, ligD::ptrA, AoargB</i> <sup>+</sup>                                                                                    | (Hagiwara et al., 2007; Miyazawa et al., 2018) |
| $\Delta amyD$                                                                        | <i>biA1, pyrG89, wA3, argB2, pyroA4, veA1, ligD::ptrA, AoargB</i> <sup>+</sup> , <i>amyD::pyrG</i>                                                                | This study                                     |
| <i>amyD</i> <sup>OE</sup>                                                            | <i>biA1, pyrG89, wA3, argB2, pyroA4, veA1, ligD::ptrA, AoargB</i> <sup>+</sup> , <i>Ptef1-amyD::pyrG</i>                                                          | This study                                     |
| $\Delta agsA$                                                                        | <i>biA1, pyrG89, wA3, argB2, pyroA4, veA1, ligD::ptrA, AoargB</i> <sup>+</sup> , <i>agsA::loxP</i>                                                                | This study                                     |
| <i>agsB</i> <sup>OE</sup>                                                            | <i>biA1, pyrG89, wA3, argB2, pyroA4, veA1, ligD::ptrA, AoargB</i> <sup>+</sup> , <i>agsA::loxP, Ptef1-agsB::pyroA</i>                                             | This study                                     |
| <i>agsB</i> <sup>OE</sup> $\Delta amyD$                                              | <i>biA1, pyrG89, wA3, argB2, pyroA4, veA1, ligD::ptrA, AoargB</i> <sup>+</sup> , <i>agsA::loxP, Ptef1-agsB::pyroA, amyD::pyrG</i>                                 | This study                                     |
| <i>agsB</i> <sup>OE</sup> <i>amyD</i> <sup>OE</sup>                                  | <i>biA1, pyrG89, wA3, argB2, pyroA4, veA1, ligD::ptrA, AoargB</i> <sup>+</sup> , <i>agsA::loxP, Ptef1-agsB::pyroA, Ptef1-amyD::pyrG</i>                           | This study                                     |
| $\Delta agsB$                                                                        | <i>biA1, pyrG89, wA3, argB2, pyroA4, veA1, ligD::ptrA, agsB::argB</i>                                                                                             | (Yoshimi et al., 2013)                         |
| <i>agsA</i> <sup>OE</sup>                                                            | <i>biA1, pyrG89, wA3, argB2, pyroA4, veA1, ligD::ptrA, agsB::argB, Ptef1-agsA::pyroA</i>                                                                          | This study                                     |
| <i>agsA</i> <sup>OE</sup> $\Delta amyD$                                              | <i>biA1, pyrG89, wA3, argB2, pyroA4, veA1, ligD::ptrA, agsB::argB, Ptef1-agsA::pyroA, amyD::pyrG</i>                                                              | This study                                     |
| <i>agsA</i> <sup>OE</sup> <i>amyD</i> <sup>OE</sup>                                  | <i>biA1, pyrG89, wA3, argB2, pyroA4, veA1, ligD::ptrA, agsB::argB, Ptef1-agsA::pyroA, Ptef1-amyD::pyrG</i>                                                        | This study                                     |
| $\Delta amyD$ - <i>amyD</i> <sup>OE</sup>                                            | <i>biA1, pyrG89, wA3, argB2, pyroA4, veA1, ligD::ptrA, AoargB</i> <sup>+</sup> , <i>amyD::pyrG, Ptef1-amyD::hph, pyrG</i> <sup>-</sup>                            | This study                                     |
| $\Delta amyD$ - <i>amyD</i> <sup>OE</sup> ( $\Delta GPI$ )                           | <i>biA1, pyrG89, wA3, argB2, pyroA4, veA1, ligD::ptrA, AoargB</i> <sup>+</sup> , <i>amyD::pyrG, Ptef1-amyD(<math>\Delta GPI</math>)::hph, pyrG</i> <sup>-</sup>   | This study                                     |
| <i>agsB</i> <sup>OE</sup> $\Delta amyD$ - <i>amyD</i> <sup>OE</sup>                  | <i>biA1, pyrG89, wA3, argB2, pyroA4, veA1, ligD::ptrA, agsB::argB, Ptef1-agsA::pyroA, amyD::pyrG, Ptef1-amyD::hph, pyrG</i> <sup>-</sup>                          | This study                                     |
| <i>agsB</i> <sup>OE</sup> $\Delta amyD$ - <i>amyD</i> <sup>OE</sup> ( $\Delta GPI$ ) | <i>biA1, pyrG89, wA3, argB2, pyroA4, veA1, ligD::ptrA, agsB::argB, Ptef1-agsA::pyroA, amyD::pyrG, Ptef1-amyD(<math>\Delta GPI</math>)::hph, pyrG</i> <sup>-</sup> | This study                                     |

639 <sup>a</sup> Fungal Genetic Stock Center, USA

640 **Table 2. Molecular mass of alkali-soluble glucan in the cell wall.**

| Sample                                                  | $M_p$ <sup>b</sup>  | $M_w$ <sup>c</sup>  | $M_n$ <sup>d</sup>  | $M_w/M_n$   |
|---------------------------------------------------------|---------------------|---------------------|---------------------|-------------|
| WT AS2 <sup>a</sup>                                     | 2□830□000 ± 400□000 | 3□510□000 ± 320□000 | 2□280□000 ± 320□000 | 1.55 ± 0.10 |
| <i>amyD</i> <sup>OE</sup> AS2, peak 1                   | 2□640□000 ± 400□000 | 3□350□000 ± 660□000 | 2□210□000 ± 700□000 | 1.57 ± 0.25 |
| <i>amyD</i> <sup>OE</sup> AS2, peak 2                   | 28□100 ± 1□100      | 41□600 ± 2□600      | 32□900 ± 300        | 1.30 ± 0.07 |
| $\Delta amyD$ AS2                                       | 2□910□000 ± 270□000 | 3□540□000 ± 400□000 | 2□390□000 ± 400□000 | 1.49 ± 0.10 |
| <i>agsA</i> <sup>OE</sup> AS2                           | 1□930□000 ± 430□000 | 2□410□000 ± 240□000 | 1□260□000 ± 270□000 | 1.94 ± 0.20 |
| <i>agsA</i> <sup>OE</sup> <i>amyD</i> <sup>OE</sup> AS2 | 2□000□000 ± 120□000 | 2□150□000 ± 170□000 | 1□110□000 ± 110□000 | 1.94 ± 0.05 |
| <i>agsA</i> <sup>OE</sup> $\Delta amyD$ AS2             | 2□700□000 ± 300□000 | 3□380□000 ± 230□000 | 2□250□000 ± 130□000 | 1.50 ± 0.05 |
| <i>agsB</i> <sup>OE</sup> AS2                           | 623□000 ± 7□000     | 1□144□000 ± 13□000  | 312□000 ± 5□000     | 3.67 ± 0.03 |
| <i>agsB</i> <sup>OE</sup> <i>amyD</i> <sup>OE</sup> AS2 | 169□000 ± 15□000    | 664□000 ± 14□000    | 140□000 ± 8□000     | 4.77 ± 0.16 |
| <i>agsB</i> <sup>OE</sup> $\Delta amyD$ AS2             | 877□000 ± 91□000    | 1□435□000 ± 61□000  | 358□000 ± 19□000    | 4.01 ± 0.12 |

641 <sup>a</sup> AS2, insoluble components after dialysis of the alkali-soluble fraction

642 <sup>b</sup> Peak molecular mass

643 <sup>c</sup> Weight-average molecular mass

644 <sup>d</sup> Number-average molecular mass

645 Values are mean ± standard deviation of three replicates

646 **Table 3. Molecular mass of alkali-soluble glucan in the cell wall of  $\Delta amyD$ - $amyD^{OE}$**   
647 **strains.**

| Sample                                                     | $M_p^b$               | $M_w^c$                        | $M_n^d$              | $M_w/M_n$   |
|------------------------------------------------------------|-----------------------|--------------------------------|----------------------|-------------|
| $agsB^{OE} \Delta amyD$ AS2 <sup>a</sup>                   | 391 □ 000 ± 68 □ 000  | 1 □ 107 □ 000 ± 47 □ 000       | 270 □ 000 ± 8 □ 000  | 4.11 ± 0.29 |
| $agsB^{OE} \Delta amyD$ - $amyD^{OE}$ AS2                  | 220 □ 000 ± 19 □ 000  | 742 □ 000 ± 107 □ 000          | 174 □ 000 ± 8 □ 000  | 4.25 ± 0.44 |
| $agsB^{OE} \Delta amyD$ - $amyD^{OE}$ ( $\Delta GPI$ ) AS2 | 807 □ 000 ± 233 □ 000 | 1 □ 450 □ 000 ± 128 □ 000<br>0 | 349 □ 000 ± 42 □ 000 | 4.16 ± 0.14 |

648 <sup>a</sup> AS2, insoluble components after dialysis of the alkali-soluble fraction

649 <sup>b</sup> Peak molecular mass

650 <sup>c</sup> Weight-average molecular mass

651 <sup>d</sup> Number-average molecular mass

652 Values are mean ± standard deviation of three replicates

## 653 Figure legends

654 **Figure 1. Transcript levels of the  $amyD$  gene determined by quantitative PCR.** Gene-  
655 specific primers are indicated in Table S1. Error bars represent the standard deviation of the  
656 mean calculated from three replicates. \*Significant differences by Tukey's test ( $P < 0.05$ );  
657 n.s., not significant.

658 **Figure 2. Growth characteristics of  $amyD^{OE}$  and  $\Delta amyD$  strains in liquid culture.** Upper  
659 images, cultures in Erlenmeyer flasks; lower images, representative hyphal pellets of each  
660 strain under a stereomicroscope. Scale intervals are 1 mm.

661 **Figure 3. Amount of glucose in AS2 fractions.** Conidia ( $5.0 \times 10^5$ /mL) of each strain were  
662 inoculated into CD medium and rotated at 160 rpm at 37°C for 24 h. Values show glucose  
663 content of the AS2 fraction as a percentage of the total cell-wall weight. Error bars represent  
664 standard error of the mean calculated from three replicates. \*Significant difference by  
665 Tukey's test ( $P < 0.05$ ); n.s., not significant.

666 **Figure 4. GPC elution profile of the AS2 fraction from the series of (A)  $agsA^{OE}$  strains,**  
667 **(B)  $agsB^{OE}$  strains, and (C) wild type.** The AS2 fraction from 24-h-cultured mycelia of each  
668 strain was dissolved in 20 mM LiCl/DMAc. The elution profile was monitored by a refractive  
669 index detector. Molecular masses (MM) of the glucan peaks were determined from a  
670 calibration curve of polystyrene (PS) standards (◆).  $M_w$ , weight-average MM;  $M_n$ , number-  
671 average MM.

672 **Figure 5. Localization of cell-wall polysaccharides of vegetative hyphae.** Hyphae cultured  
673 for 16 h were fixed and stained with AGBD-GFP for  $\alpha$ -1,3-glucan, fluorophore-labeled

674 antibody for  $\beta$ -1,3-glucan, and fluorophore-labeled lectin for chitin. Scale bars are 10  $\mu$ m.

675 **Figure 6. Growth characteristics of  $\Delta amyD$ - $amyD^{OE}$  strains in liquid culture.** Upper  
676 images, cultures in Erlenmeyer flasks; lower images, representative hyphal pellets of each  
677 strain under a stereomicroscope. Scale intervals are 1 mm.

678 **Figure 7. (A, B) Amounts of glucose and (C) GPC elution profiles of the AS2 fraction in**  
679  **$\Delta amyD$ - $amyD^{OE}$  strains. (A, B)** Conidia ( $5.0 \times 10^5$ /mL) of each strain were inoculated into  
680 CD medium and rotated at 160 rpm at 37°C for 24 h. Values show glucose content of AS2  
681 fraction as a percentage of the total cell-wall weight. Error bars represent standard error of the  
682 mean calculated from three replicates. \*Significant difference by Tukey's test (\* $P < 0.05$ );  
683 n.s., not significant. (C) The AS2 fraction from 24-h-cultured mycelia of each strain was  
684 dissolved in 20 mM LiCl/DMAc. The elution profile was monitored by a refractive index  
685 detector. Molecular masses (MM) of the glucan peaks were determined from a calibration  
686 curve of polystyrene (PS) standards ( $\square$ ).  $M_w$ , weight-average MM;  $M_n$ , number-average MM.  
687 replicates.

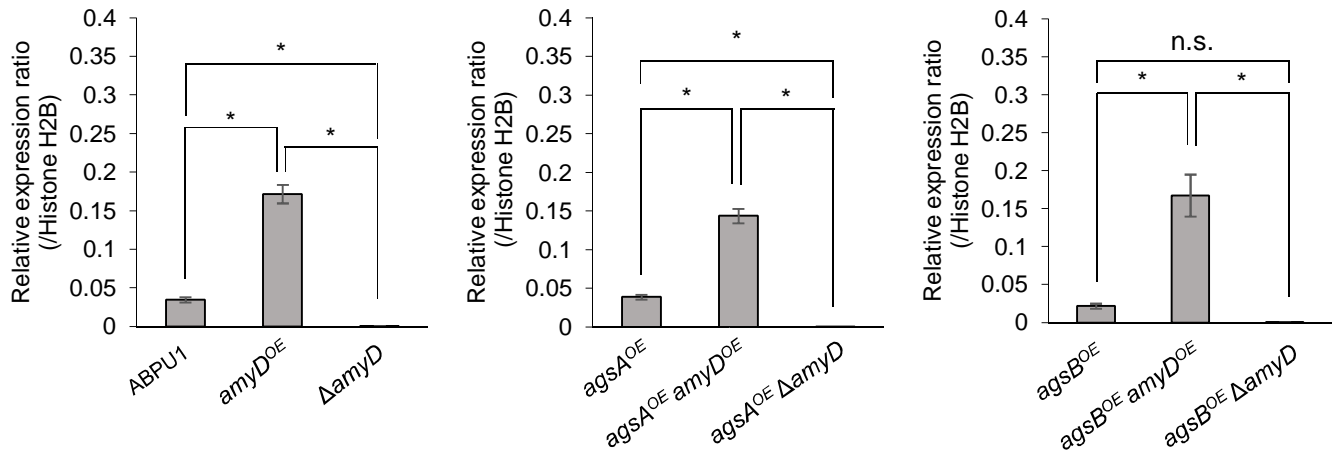

Figure 1

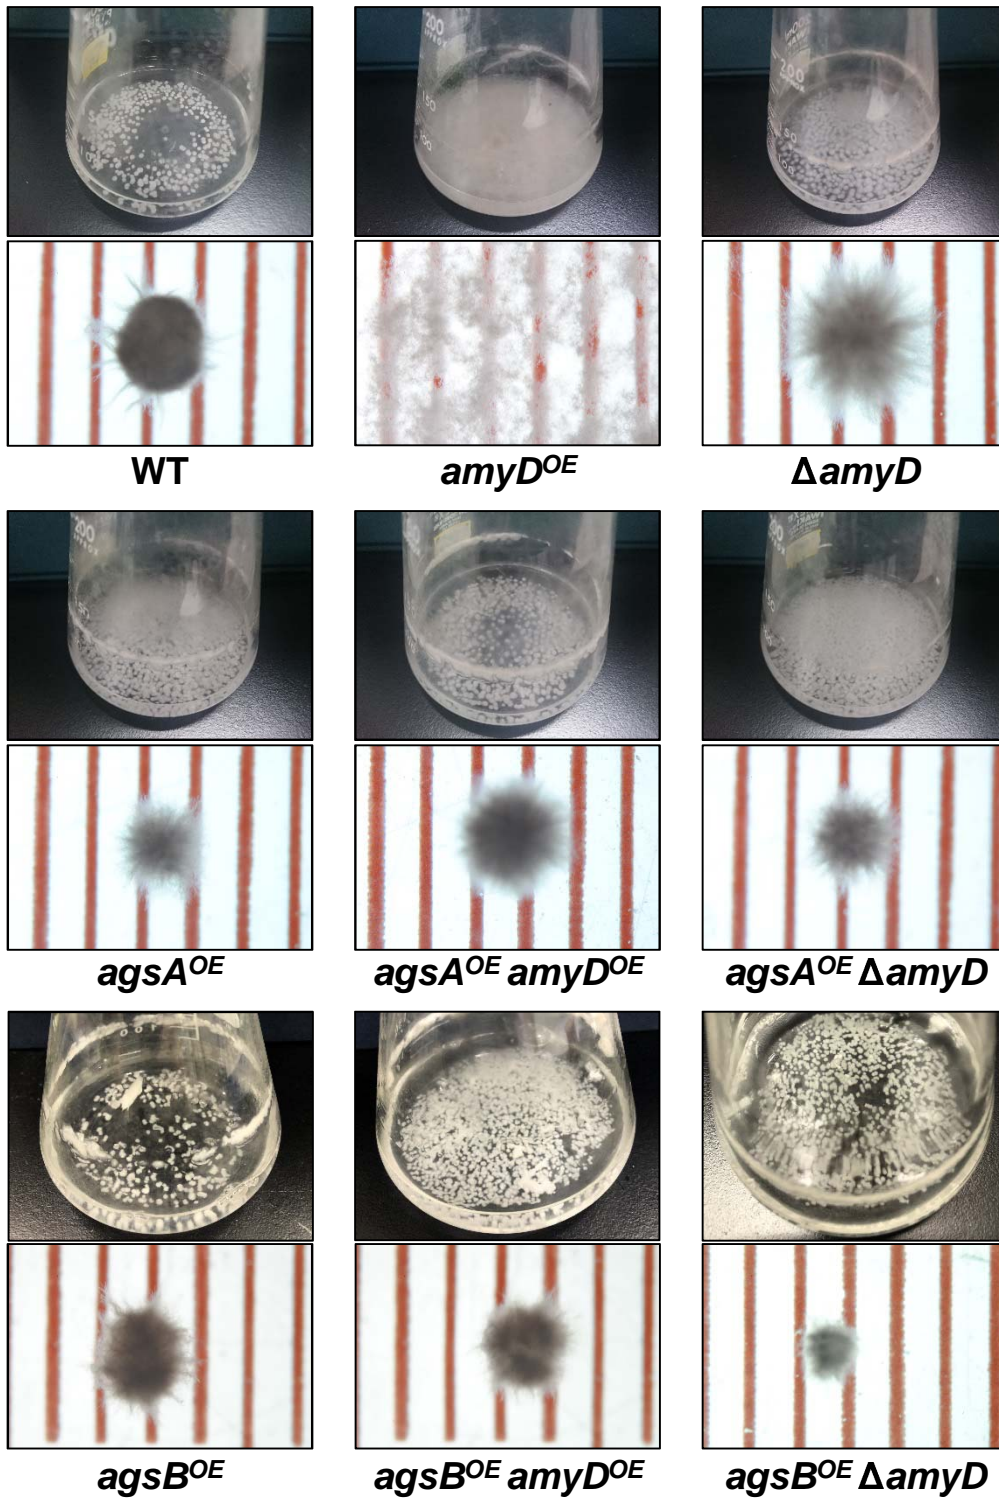

Figure 2

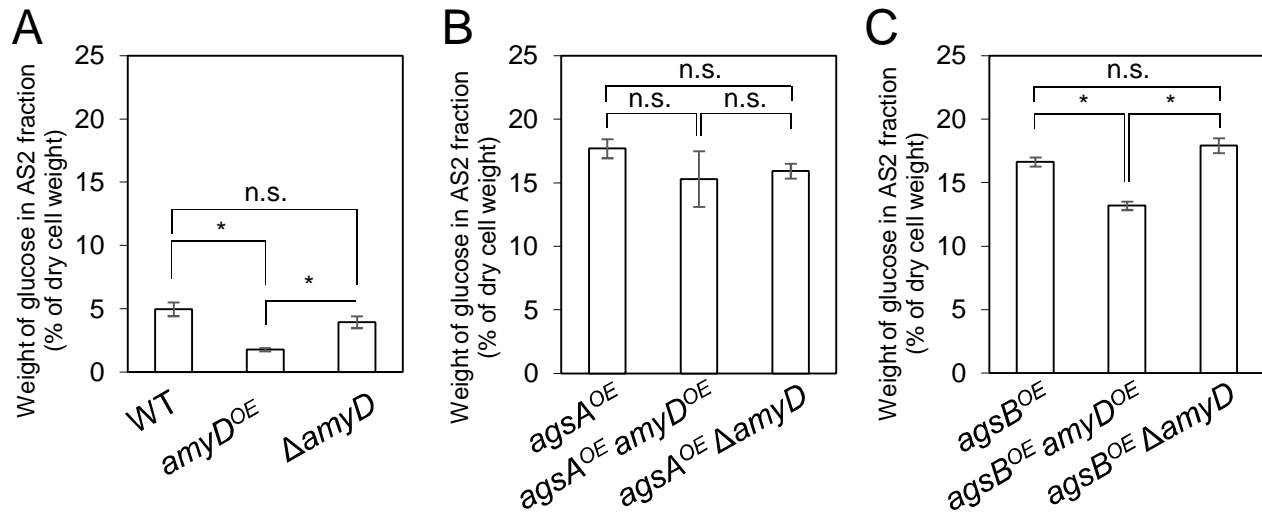

Figure 3



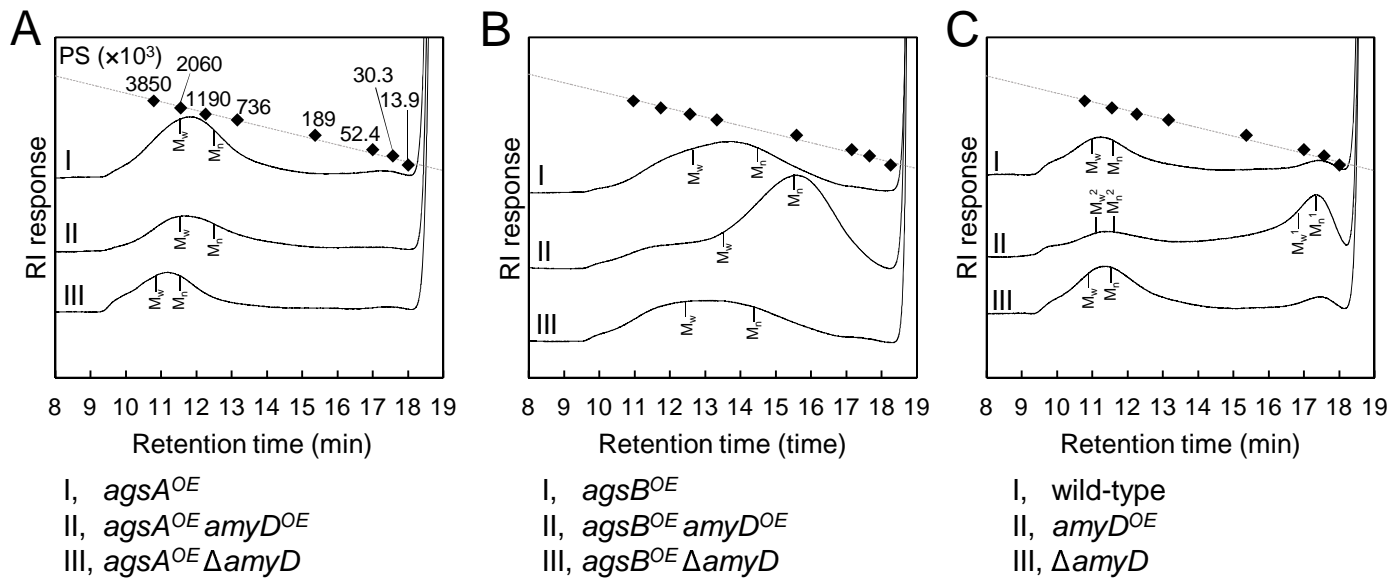

Figure 4

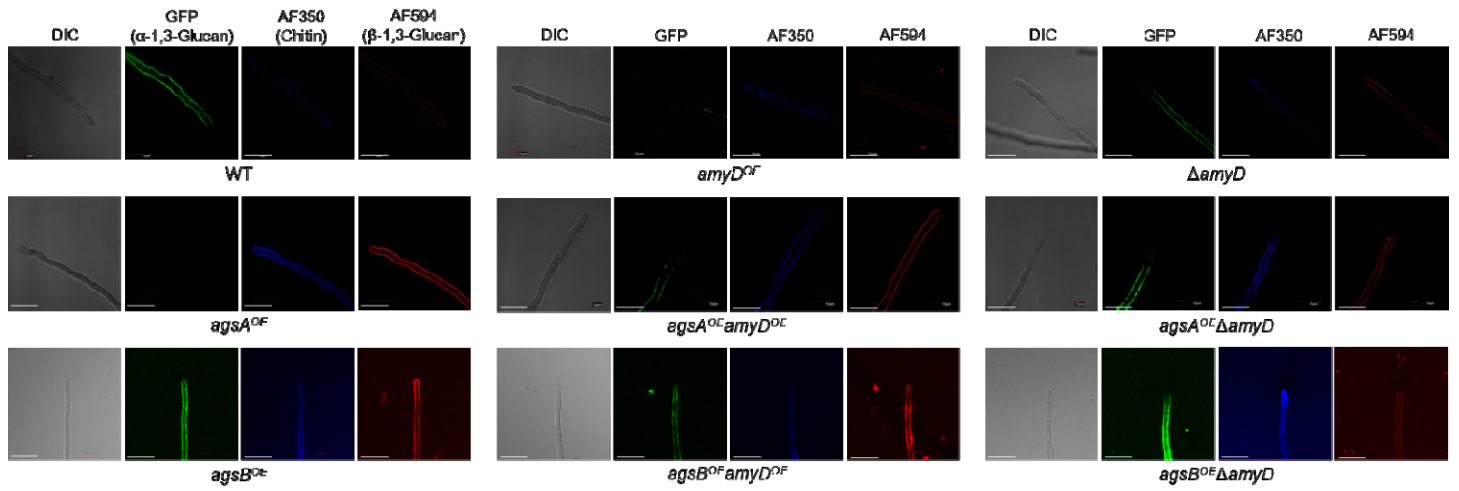

Figure 5

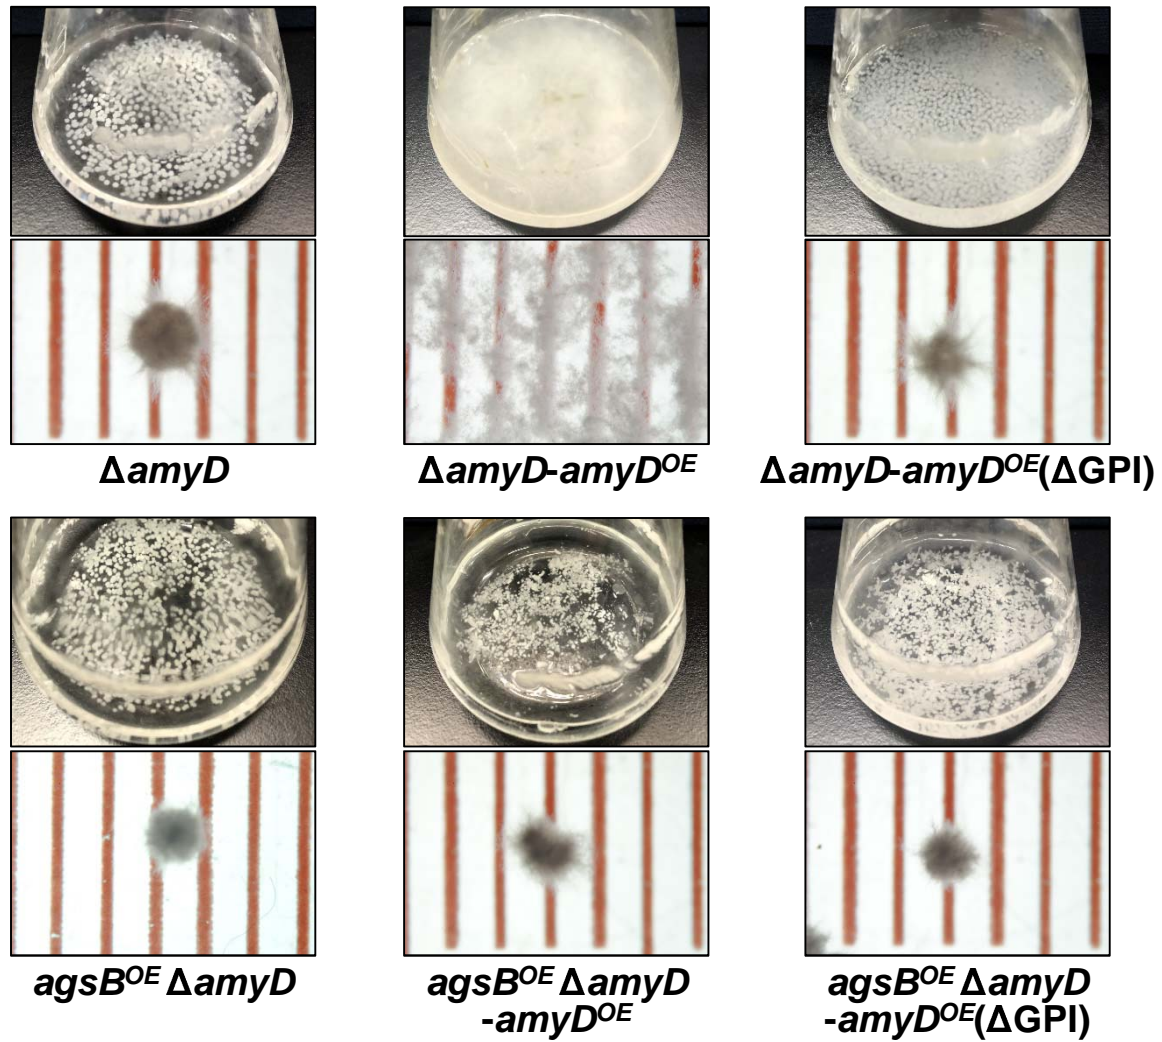

Figure 6

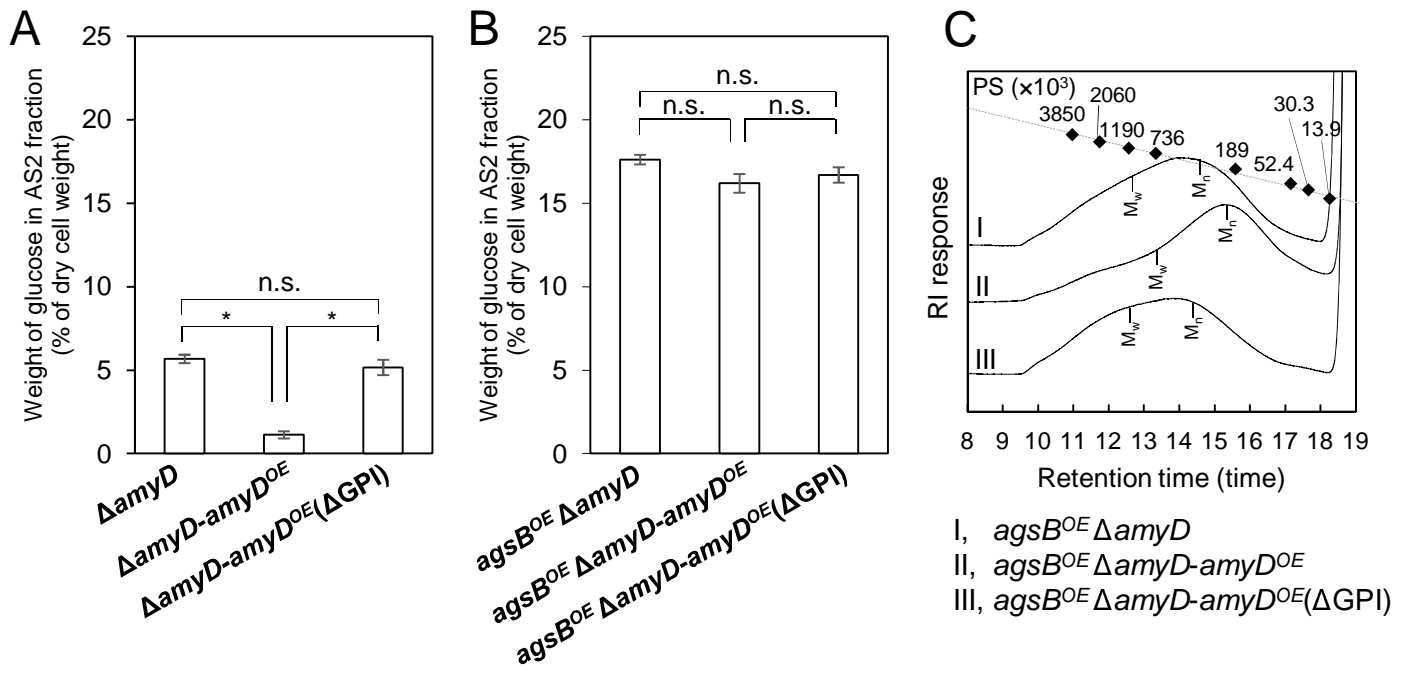

Figure 7
